# Supplementary material for: The behaviour of charged particles (ions) during new particle formation events in urban Leipzig (Germany)
Source: Copernicus journal article supplement (doi:10.5194/egusphere-2024-742), 2024-04-03
Supplement: Supplementary file 1 [file egusphere-2024-742-supplement.pdf]

**SUPPLEMENTARY INFORMATION (SI)**

**The behaviour of charged particles (ions) during new particle formation events in urban Leipzig (Germany)**

5 Alex Rowell, James Brean, David C.S. Beddows, Zongbo Shi, Avinash Kumar, Matti Rissanen, Miikka Dal Maso, Peter Mettke, Kay Weinhold, Maik Merkel, Roy M. Harrison

## 1. RESULTS

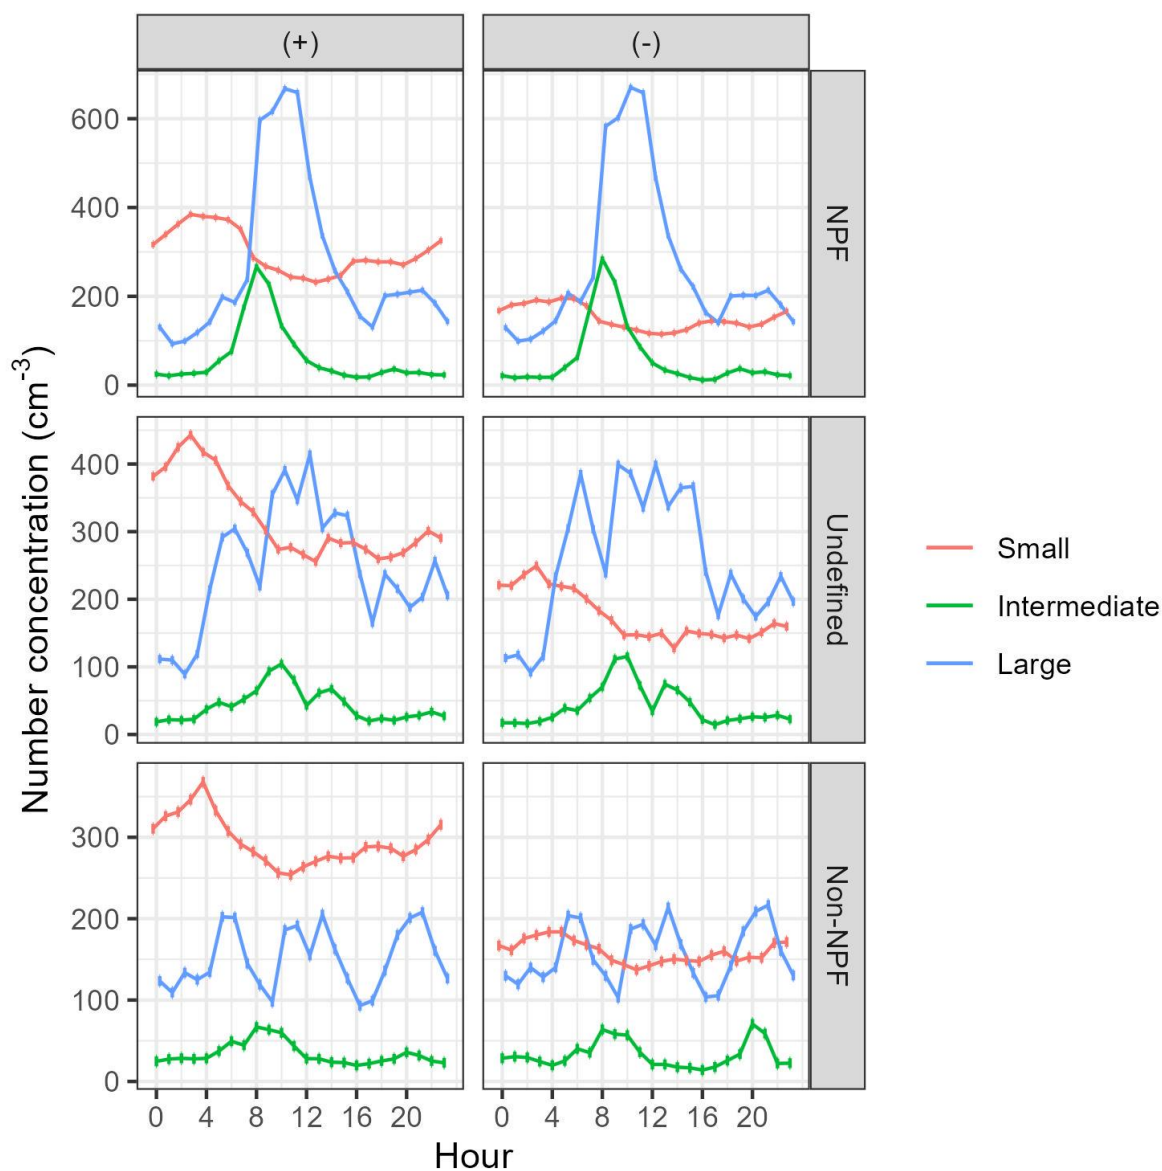

10 **Figure S1: Diurnal cycles of small (0.8–1.6 nm), intermediate (1.6–7.5 nm), and large (7.5–22 nm) charged particles on new particle formation (NPF) event, undefined, and non-NPF event days. The vertical lines represent the standard error of the mean. Data coverage: 27<sup>th</sup> July 2022 14:00 to 25 August 2022 08:00 (UTC) using hourly means.**
